# Supplementary material
Source: PubMed Central journal article supplement (PMC4507425)
Supplement: NIHMS706306-supplement-Supplemental_tables.pdf [file NIHMS706306-supplement-Supplemental_tables.pdf]

## Supplementary Online Content

Pineles SL, Repka MX, Yu F, Lum F, Coleman AL. Risk of musculoskeletal injuries, fractures, and falls in Medicare beneficiaries with disorders of binocular vision. *JAMA Ophthalmol*. Published online October 23, 2014. doi:10.1001/jamaophthalmol.2014.3941.

**eTable 1.** *International Classification of Diseases, Ninth Revision, Clinical Modification (ICD-9-CM) and Current Procedural Terminology (CPT) codes included in definition of fractures with and without surgical repair, musculoskeletal injury and falls*

**eTable 2.** *International Classification of Diseases, Ninth Revision, Clinical Modification (ICD-9-CM) codes included in definition of comorbidities and ocular comorbidities*

This supplementary material has been provided by the authors to give readers additional information about their work.

**eTable 1.** *International Classification of Diseases, Ninth Revision, Clinical Modification (ICD-9-CM) and Current Procedural Terminology (CPT) Codes Included in Definition of Fractures With and Without Surgical Repair, Musculoskeletal Injury and Falls*

| <b>Type of Fracture</b>         | <b>Eligible ICD-9-CM Codes</b>                                                                                                                                                                                                                                                                                                          |
|---------------------------------|-----------------------------------------------------------------------------------------------------------------------------------------------------------------------------------------------------------------------------------------------------------------------------------------------------------------------------------------|
| Skull/face                      | 800.x-804.x                                                                                                                                                                                                                                                                                                                             |
| Vertebral                       | 805.x-806.x                                                                                                                                                                                                                                                                                                                             |
| Ribs/sternum                    | 807.x                                                                                                                                                                                                                                                                                                                                   |
| Pelvis                          | 808.x                                                                                                                                                                                                                                                                                                                                   |
| Ill-defined bone/trunk          | 809.x                                                                                                                                                                                                                                                                                                                                   |
| Shoulder                        | 810.x-811.x                                                                                                                                                                                                                                                                                                                             |
| Arm                             | 812.x-813.x                                                                                                                                                                                                                                                                                                                             |
| Wrist/hand                      | 814.x-817.x                                                                                                                                                                                                                                                                                                                             |
| Ill-defined/multiple upper limb | 818.x-819.x                                                                                                                                                                                                                                                                                                                             |
| Leg                             | 820.x-823.x                                                                                                                                                                                                                                                                                                                             |
| Ankle/foot                      | 824.x-826.x                                                                                                                                                                                                                                                                                                                             |
| Ill-defined/multiple lower limb | 827.x-828.x                                                                                                                                                                                                                                                                                                                             |
| Unspecified                     | 829.x                                                                                                                                                                                                                                                                                                                                   |
| <b>Type of Fracture Repair</b>  | <b>Eligible CPT Codes</b>                                                                                                                                                                                                                                                                                                               |
| Head                            | 21310, 21315, 21320, 21325, 21330, 21335, 21337, 21338, 21339, 21345, 21346, 21347, 21348, 21356, 21360, 21365, 21366, 21385, 21386, 21387, 21390, 21395, 21400, 21401, 21406, 21407, 21408, 21421, 21422, 21423, 21440, 21445, 21450, 21451, 21453, 21454, 21461, 21462, 21465                                                         |
| Neck/thorax                     | 21800, 21805, 21820, 21825                                                                                                                                                                                                                                                                                                              |
| Spine                           | 22305, 22310, 22315, 22326, 22327, 22328                                                                                                                                                                                                                                                                                                |
| Shoulder                        | 23500, 23505, 23515, 23570, 23575, 23585                                                                                                                                                                                                                                                                                                |
| Forearm/wrist                   | 23614, 23616, 23620, 23625, 23630, 23665, 23670, 24500, 24505, 24515, 24545, 24546, 24575, 24576, 24577, 24579, 24586, 24587, 24620, 24635, 24650, 24655, 24665, 24666, 24670, 24675, 24685, 25500, 25505, 25515, 25520, 25525, 25526, 25530, 25535, 25545, 25560, 25565, 25574, 25575, 25605, 25607, 25608, 25609, 25652, 25650, 25652 |
| Hand                            | 25622, 25624, 25628, 25630, 25635, 25645, 26600, 26605, 26607, 26608, 26615, 26645, 26650, 26665, 26720, 26725, 26727, 26735, 26740, 26742, 26746, 26750, 26755, 26756, 26765                                                                                                                                                           |
| Pelvis/hip                      | 27193, 27194, 27215, 27216, 27217, 27218, 27220, 27222, 27254                                                                                                                                                                                                                                                                           |

|                                                               |                                                                                                                                                                        |
|---------------------------------------------------------------|------------------------------------------------------------------------------------------------------------------------------------------------------------------------|
| Upper leg/knee                                                | 27230, 27232, 27235, 27236, 27238, 27240, 27254, 27267, 27268, 27269, 27500, 27501, 27502, 27503, 27506, 27507, 27508, 27509, 27510, 27511, 27513, 27514, 27520, 27524 |
| Lower leg                                                     | 27530, 27532, 27535, 27536, 27538, 27750, 27752, 27756, 27758, 27780, 27781, 27784, 27786, 27788, 27792, 27824, 27825, 27826, 27827, 27828, 27855, 27856, 27892        |
| Ankle                                                         | 27760, 27762, 27766, 27767, 27768, 27769, 27808, 27810, 27814, 27816, 27818, 27822, 27823                                                                              |
| Foot                                                          | 28400, 28405, 28406, 28415, 28420, 28430, 28435, 28436, 28445, 28456, 28465, 28470, 28475, 28476, 28485, 28490, 28495, 28496, 28505, 28510, 28515, 28525               |
| Hip fractures                                                 | ICD9: 808.x, 820.x<br>CPT: 27193, 27194, 27215, 27216, 27217, 27218, 27220, 27222, 27254                                                                               |
| <b>Musculoskeletal Injury</b>                                 | <b>Eligible ICD-9-CM Codes</b>                                                                                                                                         |
| <u>Rotator cuff syndrome of shoulder and allied disorders</u> | 726.1X                                                                                                                                                                 |
| <u>Dislocation:</u>                                           | 831                                                                                                                                                                    |
| Shoulder                                                      | 832                                                                                                                                                                    |
| Elbow                                                         | 833                                                                                                                                                                    |
| Wrist                                                         | 835                                                                                                                                                                    |
| Hip                                                           | 836                                                                                                                                                                    |
| Knee                                                          | 837                                                                                                                                                                    |
| Angle                                                         |                                                                                                                                                                        |
| <u>Pathological dislocation</u>                               | 718.2                                                                                                                                                                  |
| Of joint, unspecified                                         | 718.21                                                                                                                                                                 |
| Shoulder region                                               | 718.22                                                                                                                                                                 |
| Upper arm                                                     | 718.23                                                                                                                                                                 |
| Forearm                                                       | 718.25                                                                                                                                                                 |
| Pelvic region and thigh                                       | 718.26                                                                                                                                                                 |
| Lower leg                                                     | 718.27                                                                                                                                                                 |
| Ankle and foot                                                | 718.28                                                                                                                                                                 |
| Other specified sites                                         | 718.29                                                                                                                                                                 |
| Multiple sites                                                |                                                                                                                                                                        |
| <u>Internal derangement of knee</u>                           | 717.1                                                                                                                                                                  |
| Derangement of anterior horn of medial meniscus               | 717.2                                                                                                                                                                  |
| Derangement of posterior horn of medial meniscus              | 717.3                                                                                                                                                                  |
| Other and unspecified derangement of medial meniscus          | 717.4                                                                                                                                                                  |
| Derangement of lateral meniscus                               | 717.5                                                                                                                                                                  |
| Derangement of meniscus, not elsewhere classified             | 840                                                                                                                                                                    |
|                                                               | 843                                                                                                                                                                    |
|                                                               | 844                                                                                                                                                                    |

|                                                                                                                                                                                                        |                                |
|--------------------------------------------------------------------------------------------------------------------------------------------------------------------------------------------------------|--------------------------------|
| <u>Strains and sprains</u><br>Strains and sprains of shoulder and upper arm<br>Strains and sprains of hip and thigh<br>Strains and sprains of knee and leg<br>Strains and sprains of sacroiliac region | 846                            |
| <b>Falls</b>                                                                                                                                                                                           | <b>Eligible ICD-9-CM Codes</b> |
| Falls                                                                                                                                                                                                  | E800-E999                      |

**eTable 2.** *International Classification of Diseases, Ninth Revision, Clinical Modification (ICD-9-CM) Codes Included in Definition of Comorbidities and Ocular Comorbidities*

| <b>Comorbidity</b>                         | <b>Eligible ICD-9-CM Codes</b>                                                                                                                                                     |
|--------------------------------------------|------------------------------------------------------------------------------------------------------------------------------------------------------------------------------------|
| Myocardial Infarction                      | 410.x-412.x                                                                                                                                                                        |
| Congestive Heart Failure                   | 398.91, 402.01, 402.11, 402.91, 404.01, 404.03, 404.11, 404.13, 404.91, 404.93, 428.x                                                                                              |
| Peripheral Vascular Disease                | 440.2x-440.4x, 443.81, 443.89, 443.9, 785.4x, 557.1, 557.9, V43.4                                                                                                                  |
| Cerebrovascular Disease                    | 430.x-438.x, 362.34                                                                                                                                                                |
| Dementia                                   | 290.x, 292.2x, 292.82, 294.1x                                                                                                                                                      |
| Chronic Pulmonary Disease                  | 416.8x, 416.9x, 490.x-496.x, 500.x-505.x, 506.4x, 508.1x                                                                                                                           |
| Rheumatologic Disease                      | 710.x, 714.x, 720.x, 725.x                                                                                                                                                         |
| Peptic Ulcer Disease                       | 531.x-534.x                                                                                                                                                                        |
| Diabetes Mellitus                          | 250.0x-250.3x, 250.8x-250.9x                                                                                                                                                       |
| Diabetes Mellitus w/<br>Complications      | 250.4x-250.7x                                                                                                                                                                      |
| Chronic Renal Disease                      | 403.x, 404.x, 582.x, 583.x, 585.x, 586.x, 588.x, V42.0, V45.1, V56.x                                                                                                               |
| Hemi/Paraplegia                            | 334.1, 342.x, 343.x, 344.x, 438.20-22                                                                                                                                              |
| Mild liver disease                         | 070.0, 070.1, 070.30, 070.31, 070.5x, 070.70, 570.x, 571.0, 572.0, 572.1, 573.0, 573.1, 573.2, 573.8, 573.9                                                                        |
| Moderate/severe liver disease              | 070.2x, 070.32, 070.33, 070.4x, 070.6, 070.71, 070.9, 456.0, 456.1, 456.2, 571.1, 571.2, 571.3, 571.4, 571.5, 571.6, 571.8, 571.9, 572.2, 572.3, 572.4, 572.8, 573.4, 573.5, V42.7 |
| Multiple Myeloma/Leukemia                  | 203.x-208.x                                                                                                                                                                        |
| Lymphomas                                  | 200.x-202.x                                                                                                                                                                        |
| Malignant Neoplasms                        | 140.x-172.x, 174.x-176.x 179.x-195.x                                                                                                                                               |
| Metastatic Solid Tumor                     | 196.x-199.x                                                                                                                                                                        |
| AIDS                                       | 042.x-043.x                                                                                                                                                                        |
| Osteoporosis                               | 733.0x                                                                                                                                                                             |
| Hyperthyroidism                            | 242.x                                                                                                                                                                              |
| Hyperparathyroidism                        | 252.0x                                                                                                                                                                             |
| Cushing's Syndrome                         | 255.0                                                                                                                                                                              |
| Physically Limiting Conditions             | 337.0, 342.x, 343.1, 343.4, 344.x, 356.x, 359.x, 438.2x-438.5x, 440.20-22, 443.x, 780.72                                                                                           |
| Glaucoma                                   | 365.x                                                                                                                                                                              |
| Cataract                                   | 366.1x                                                                                                                                                                             |
| Age Related Macular<br>Degeneration        | 362.5x                                                                                                                                                                             |
| Diabetes with Ophthalmic<br>Manifestations | 249.5x, 250.5x, 362.0x                                                                                                                                                             |
| Parkinson Disease                          | 332                                                                                                                                                                                |
